# Supplementary material for: Control of endothelial quiescence by FOXO-regulated metabolites
Source: PubMed Central journal article supplement (PMC8032556; doi:10.1038/s41556-021-00637-6), 2021-04-01

Source Data Fig. 4

Figure 4B

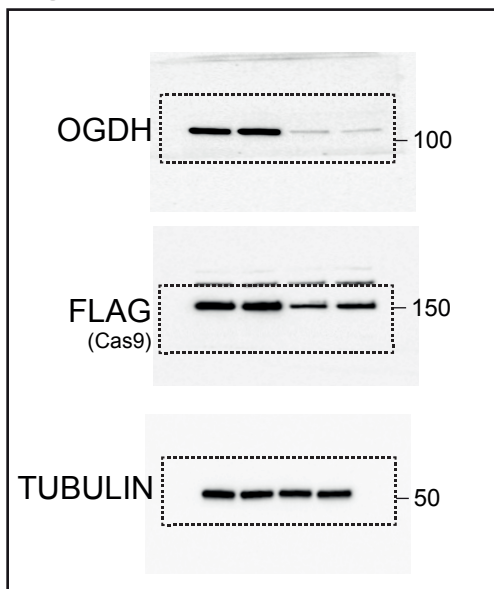

Figure 4I

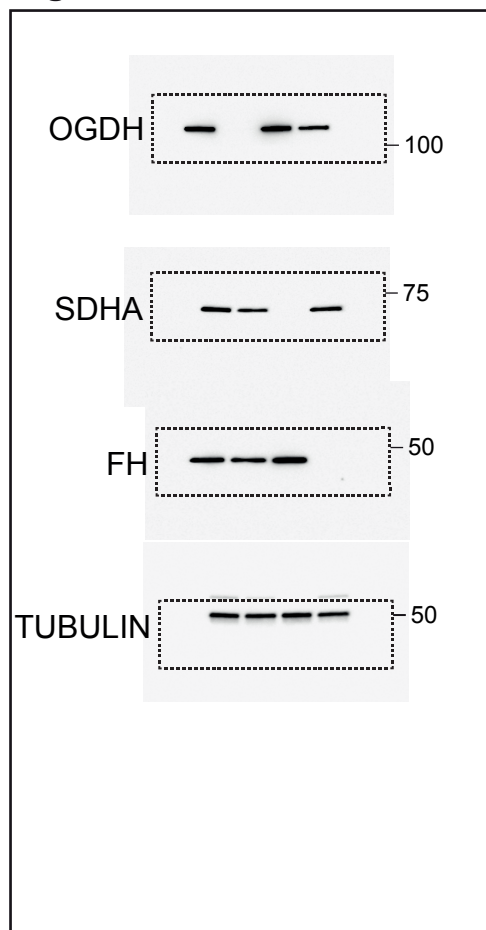

Supplement: 41556_2021_637_MOESM13_ESM.pdf [file 41556_2021_637_MOESM13_ESM.pdf]
