# Supplementary material for: Control of endothelial quiescence by FOXO-regulated metabolites
Source: PubMed Central journal article supplement (PMC8032556; doi:10.1038/s41556-021-00637-6), 2021-04-01

# Source Data Extended Data Figure 7

## Figure 7D

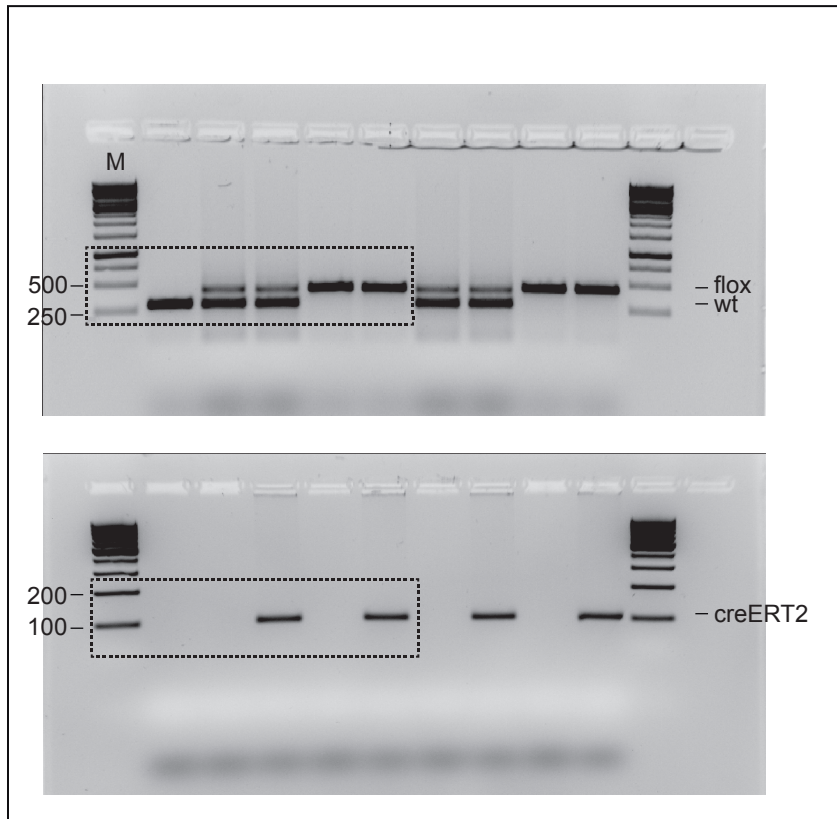

## Figure 7E

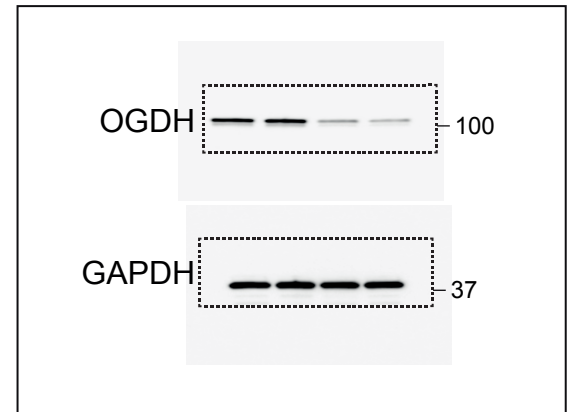

Supplement: 41556_2021_637_MOESM27_ESM.pdf [file 41556_2021_637_MOESM27_ESM.pdf]
