# Supplementary material for: Control of endothelial quiescence by FOXO-regulated metabolites
Source: PubMed Central journal article supplement (PMC8032556; doi:10.1038/s41556-021-00637-6), 2021-04-01

Source Data Extended Data Figure 8

Figure 8A

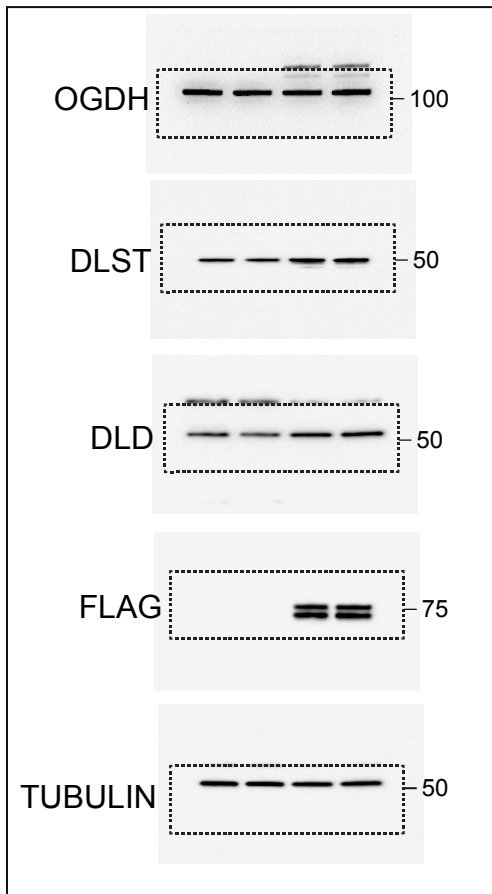

Figure 8B

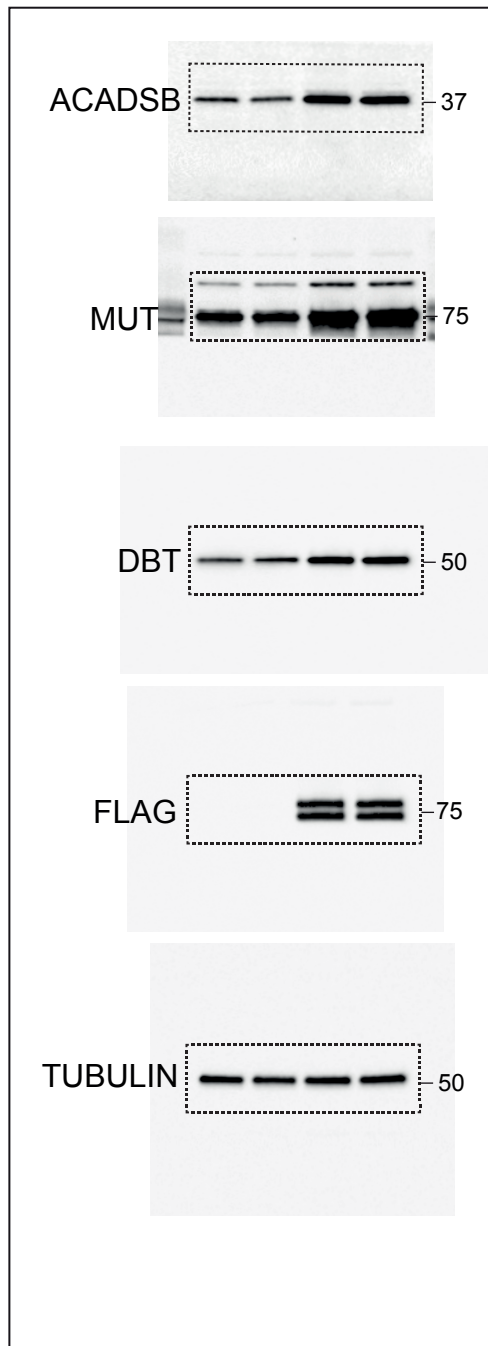

Figure 8C

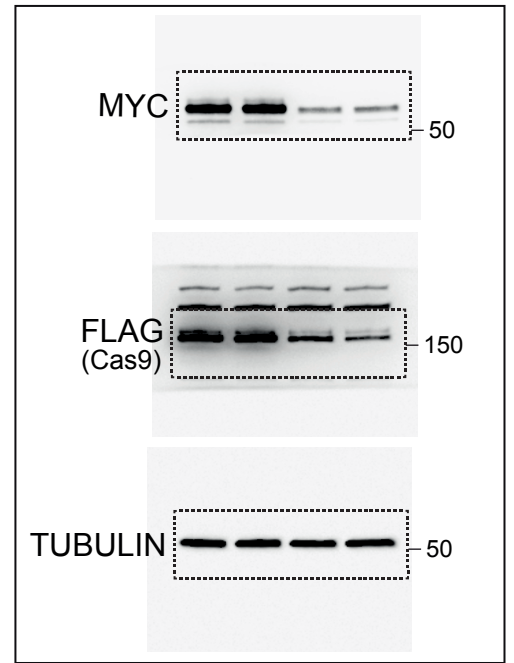

Supplement: 41556_2021_637_MOESM29_ESM.pdf [file 41556_2021_637_MOESM29_ESM.pdf]
